# Supplementary material
Source: PubMed Central journal article supplement (PMC6726563)
Supplement: NIHMS1535518-supplement-1.pdf [file NIHMS1535518-supplement-1.pdf]

## Structural basis of the differential binding of engineered knottins to integrins $\alpha V\beta 3$ and $\alpha 5\beta 1$

Johannes F. Van Agthoven<sup>1,2,3</sup>, Hengameh Shams<sup>4</sup>, Frank V. Cochran<sup>5</sup>, José L. Alonso<sup>1,2,3</sup>, James R. Kintzing<sup>5</sup>, Kiavash Garakani<sup>4</sup>, Brian D. Adair<sup>1,2,3</sup>, Jian-Ping Xiong<sup>1,2,3</sup>, Mohammad R. K. Mofrad<sup>4</sup>, Jennifer R. Cochran<sup>5</sup> and M. Amin Arnaout<sup>1,2,3\*</sup>

### Supplemental Information (SI)

#### Supplemental Figures (#3)

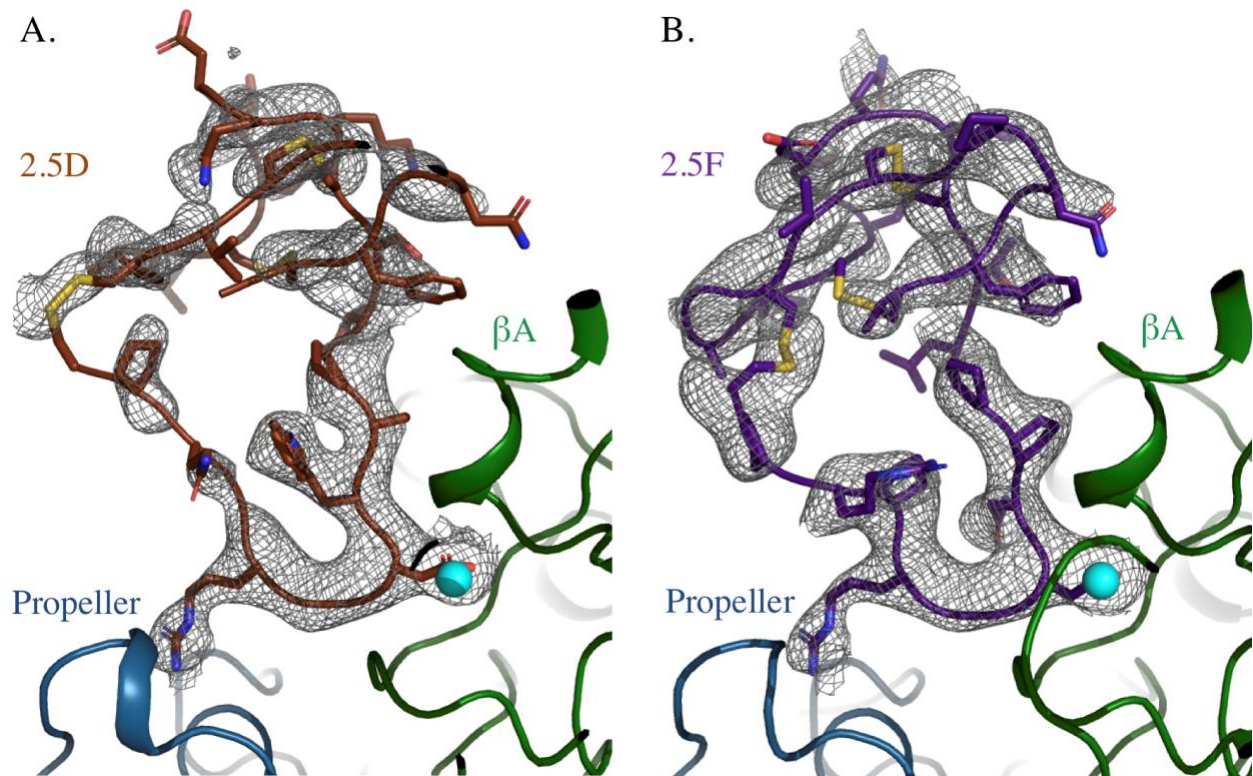

**Figure S1. Crystal structures of  $\alpha V\beta 3$  bound to 2.5D or 2.5F.** Composite simulated annealing omit maps (in grey isomesh) at  $1.0 \sigma$  of 2.5D (in brown, A) and 2.5F (in purple, B) in the knottin/ $\alpha V\beta 3$  structures (in ribbons) with only portions of the integrin propeller (blue) and  $\beta A$  (in green) domains shown. The MIDAS  $Mn^{2+}$  ion is in cyan. Related to Figure 3.

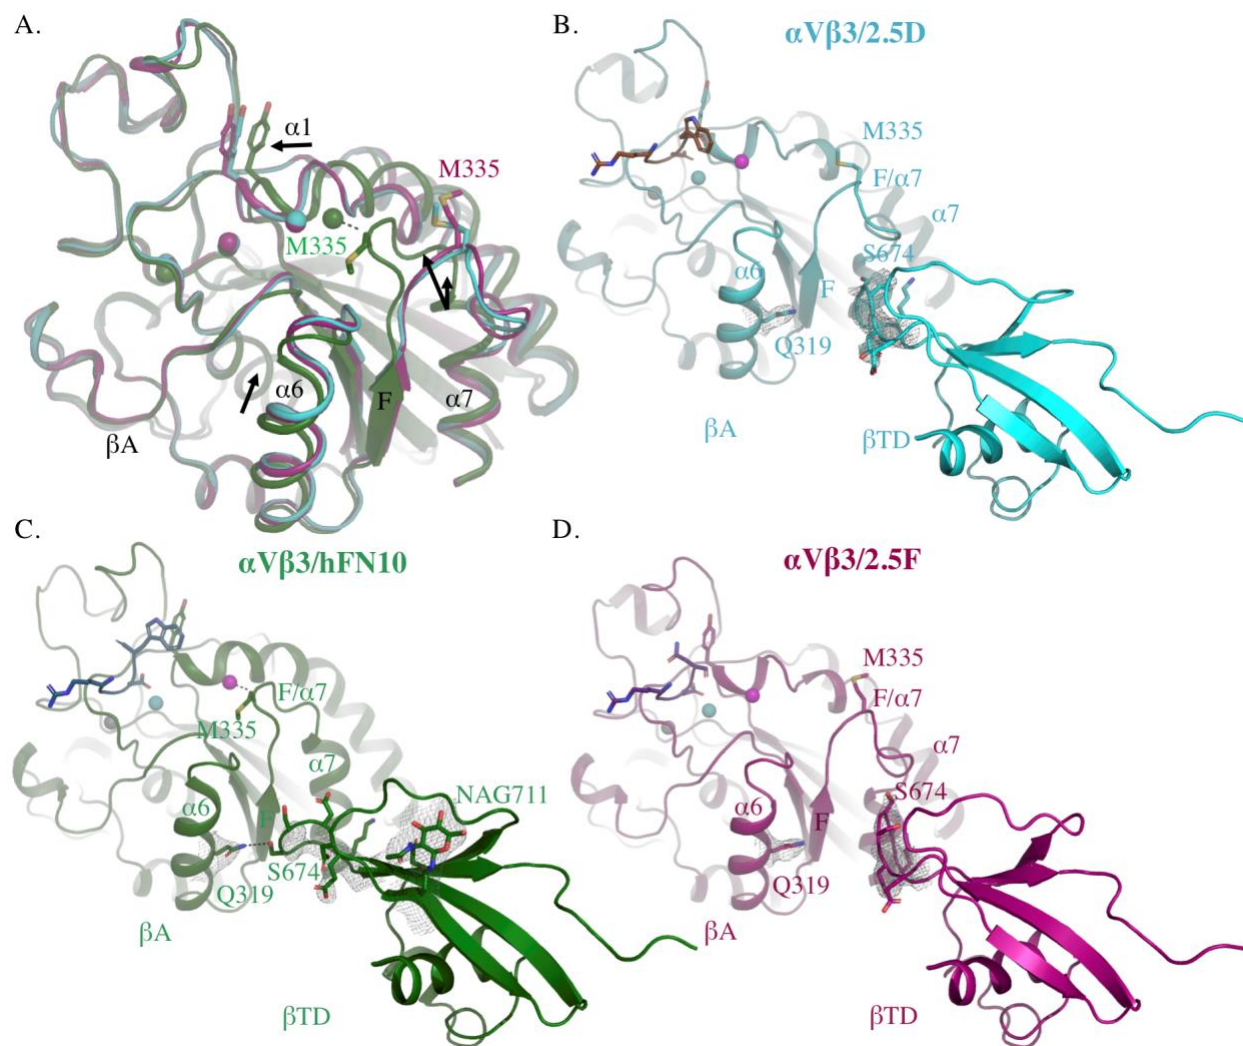

**Figure S2: Conformational changes and the  $\beta$ A/ $\beta$ -tail interface in crystal structures of  $\alpha$ V $\beta$ 3 in complex with 2.5D, 2.5F or hFN10.** A) Superimposition of  $\beta$ A domains of  $\alpha$ V $\beta$ 3 bound to hFN10 (green), 2.5F (dark pink) and 2.5D (cyan) shown in cartoon. Black arrows show the inward movement of  $\beta$ A- $\alpha$ 1 towards MIDAS and translation of  $\alpha$ 6 between  $\alpha$ V $\beta$ 3/hFN10 (inactive) and  $\alpha$ V $\beta$ 3/2.5F or  $\alpha$ V $\beta$ 3/2.5D (active). LIMBS, MIDAS and ADMIDAS are shown in spheres. (B, C, D) Cartoon diagram of  $\beta$ A domain and  $\beta$ -tail domain ( $\beta$ TD) of  $\alpha$ V $\beta$ 3/2.5D (B),  $\alpha$ V $\beta$ 3/hFN10 (C), and  $\alpha$ V $\beta$ 3/2.5F (D).  $2fo - fc$  maps at  $1.0 \sigma$  for  $\beta$ TD residues 671-676 and  $\beta$ A-Q319 in  $\alpha$ V $\beta$ 3/2.5D (B),  $\alpha$ V $\beta$ 3/hFN10 (C) and  $\alpha$ V $\beta$ 3/2.5F (D). NAG711 is shown in stick in  $\alpha$ V $\beta$ 3/hFN10 but is not detected in  $\alpha$ V $\beta$ 3/2.5D or  $\alpha$ V $\beta$ 3/2.5F. RGDW of 2.5D and hFN10, and RGDN of 2.5F are respectively shown in brown, light blue and purple sticks. LIMBS, MIDAS and ADMIDAS are shown in respectively grey, cyan and magenta spheres. Related to Figure 3.

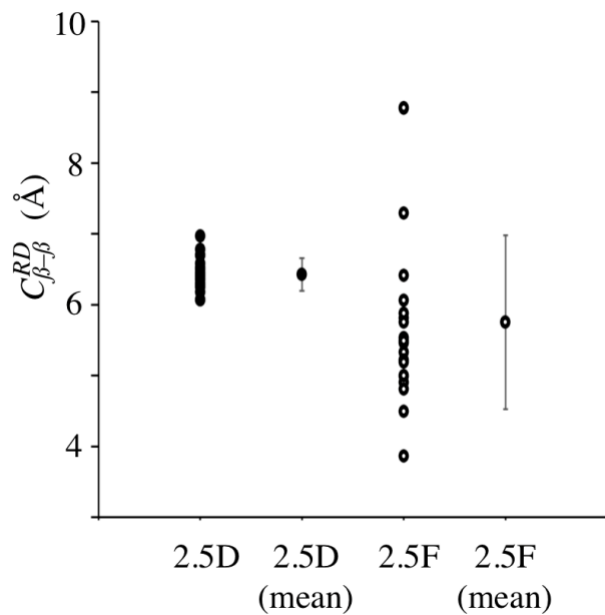

**Figure S3.**  $C_{\beta-\beta}^{RD}$  in NMR structures of **2.5D** and **2.5F**. C $\beta$ -C $\beta$  distance between R<sup>6</sup> and D<sup>8</sup> in each of the 20 NMR conformers of 2.5D (closed circles), and 2.5F (open circles). The respective mean values  $6.42 \pm 0.23 \text{ \AA}$  and  $5.75 \pm 1.23 \text{ \AA}$  are also shown. Related to Figure 4.
